# Supplementary material for: Differentiation analyses of adult suspension mononucleated peripheral blood cells of Mus musculus
Source: Springer Nature journal article supplement (doi:10.1186/1478-811x-8-29), 2010-01-01
Supplement: 12964_2010_212_MOESM1_ESM.pdf [file 12964_2010_212_MOESM1_ESM.pdf]

Undifferentiated  
Mononucleated  
Cells

Differentiated  
Mononucleated  
Cells

A

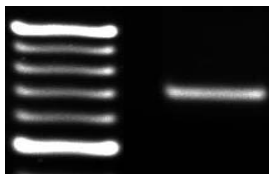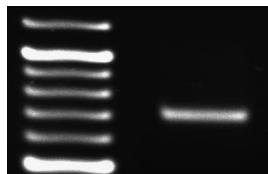

*Gapdh*  
(Housekeeping)

B

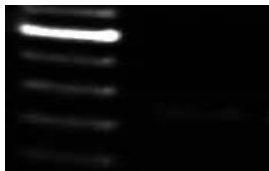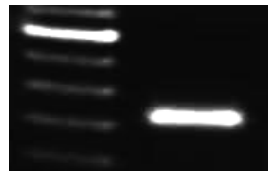

*Opn*  
(Osteoblast Marker)

C

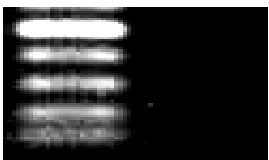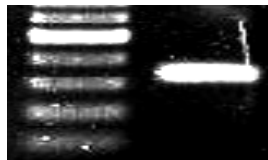

*Catk*  
(Osteoclast Marker)

Proliferation  
Medium

Differentiation  
Medium
