# Supplementary figures and images for: Differentiation analyses of adult suspension mononucleated peripheral blood cells of Mus musculus
Source: Springer Nature journal article supplement (doi:10.1186/1478-811x-8-29), 2010-01-01

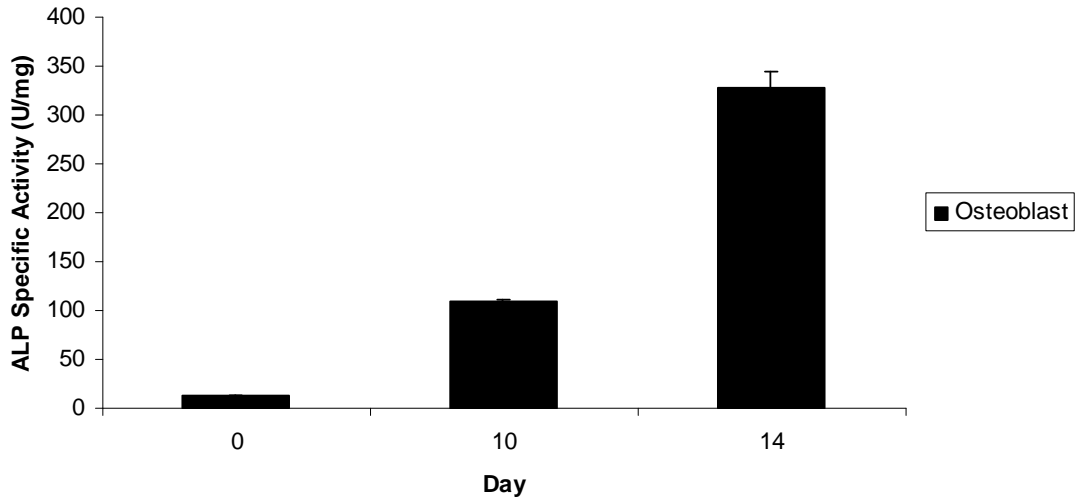

Supplement: 12964_2010_212_MOESM2_ESM.pdf [file 12964_2010_212_MOESM2_ESM.pdf]

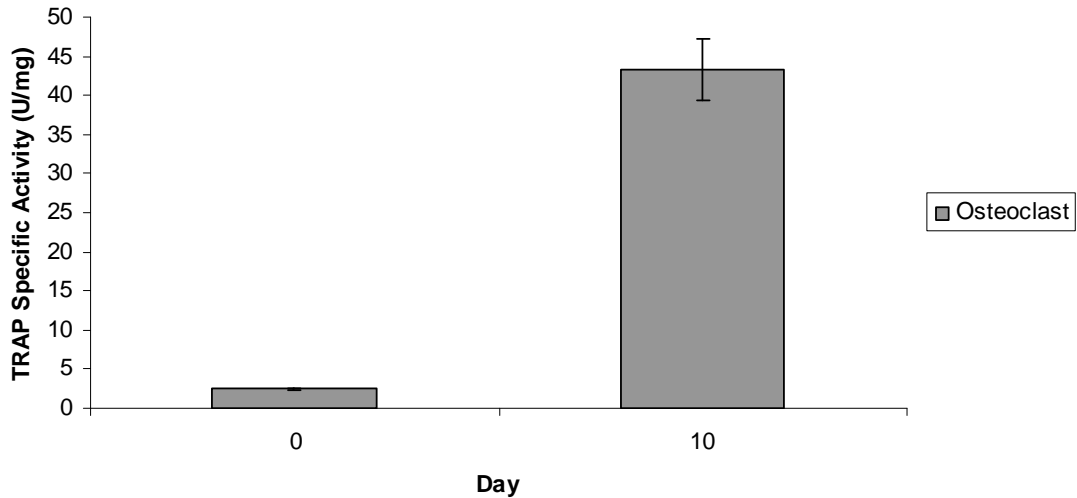

Supplement: 12964_2010_212_MOESM3_ESM.pdf [file 12964_2010_212_MOESM3_ESM.pdf]

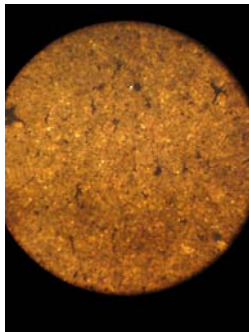

A) Control

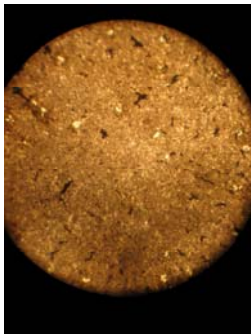

B) Day 5

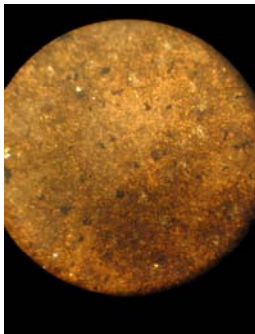

C) Day 7

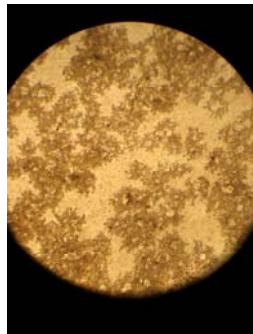

D) Day 10

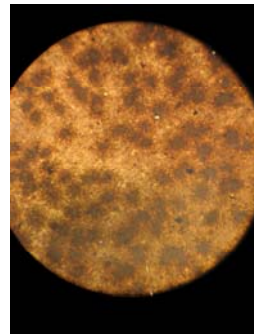

E) Day 14

Supplement: 12964_2010_212_MOESM4_ESM.pdf [file 12964_2010_212_MOESM4_ESM.pdf]

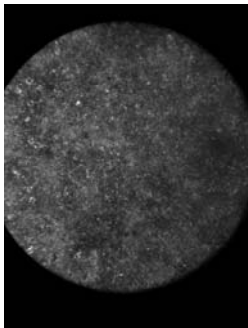

A) Control

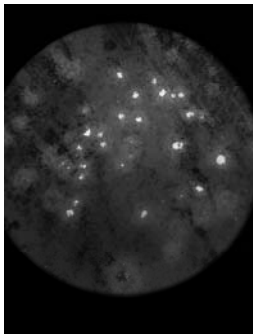

B) Day 5

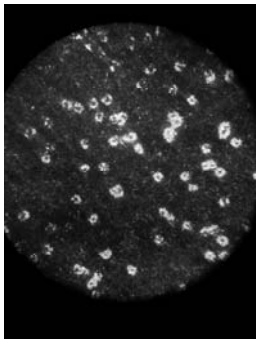

C) Day 7

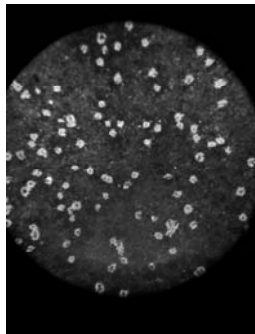

D) Day 10

Supplement: 12964_2010_212_MOESM5_ESM.pdf [file 12964_2010_212_MOESM5_ESM.pdf]

Percentage of osteoblast cells (%)

100  
90  
80  
70  
60  
50  
40  
30  
20  
10  
0

0

7

14

Day

■ Differentiated

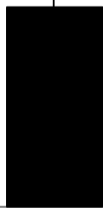

Supplement: 12964_2010_212_MOESM7_ESM.pdf [file 12964_2010_212_MOESM7_ESM.pdf]

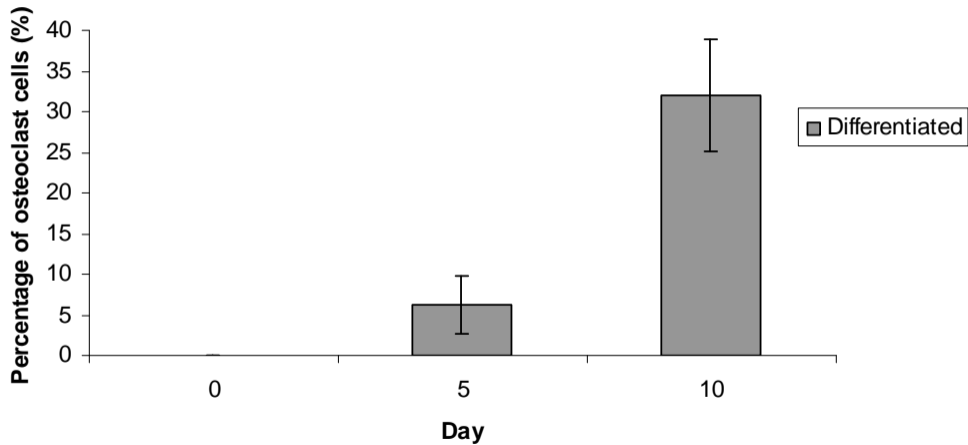

Supplement: 12964_2010_212_MOESM8_ESM.pdf [file 12964_2010_212_MOESM8_ESM.pdf]
